# Supplementary material for: Sensory Ion Channel Candidates Inform on the Clinical Course of Pancreatic Cancer and Present Potential Targets for Repurposing of FDA-Approved Agents
Source: MDPI journal article supplement (doi:10.3390/jpm12030478), 2022-03-16
Supplement: s1 [file s1]

**Table S3. KEGG pathway enrichment of TRPC3 and TRPC7 respectively**

| <b>TRPC3</b> |                                        |                        |            |               |
|--------------|----------------------------------------|------------------------|------------|---------------|
| <b>ID</b>    | <b>Description</b>                     | <b>EnrichmentScore</b> | <b>NES</b> | <b>pvalue</b> |
| hsa05150     | Staphylococcus aureus infection        | 0.70                   | 2.27       | 1.00E-10      |
| hsa05144     | Malaria                                | 0.70                   | 2.21       | 1.11E-09      |
| hsa04610     | Complement and coagulation cascades    | 0.70                   | 2.22       | 2.29E-10      |
| hsa04974     | Protein digestion and absorption       | 0.69                   | 2.24       | 1.00E-10      |
| hsa00532     | Glycosaminoglycan biosynthesis         | 0.67                   | 1.87       | 2.60E-04      |
| hsa05322     | Systemic lupus erythematosus           | 0.67                   | 2.08       | 1.63E-07      |
| hsa05310     | Asthma                                 | 0.67                   | 1.95       | 5.98E-05      |
| hsa04640     | Hematopoietic cell lineage             | 0.65                   | 2.17       | 1.00E-10      |
| hsa04512     | ECM-receptor interaction               | 0.63                   | 2.08       | 1.83E-10      |
| hsa04392     | Hippo signaling pathway                | 0.62                   | 1.81       | 4.49E-04      |
| <b>TRPC7</b> |                                        |                        |            |               |
| <b>ID</b>    | <b>Description</b>                     | <b>EnrichmentScore</b> | <b>NES</b> | <b>pvalue</b> |
| hsa04972     | Pancreatic secretion                   | -0.77                  | -4.45      | 1.00E-10      |
| hsa04970     | Salivary secretion                     | -0.73                  | -2.64      | 3.00E-05      |
| hsa04975     | Fat digestion and absorption           | -0.67                  | -2.52      | 9.79E-05      |
| hsa00500     | Starch and sucrose metabolism          | -0.57                  | -2.20      | 0.001         |
| hsa04014     | Ras signaling pathway                  | -0.55                  | -2.05      | 0.004         |
| hsa04974     | Protein digestion and absorption       | -0.55                  | -2.97      | 2.18E-06      |
| hsa04973     | Carbohydrate digestion and absorption  | -0.53                  | -2.17      | 0.001         |
| hsa04060     | Cytokine-cytokine receptor interaction | -0.52                  | -1.94      | 0.007         |
| hsa05200     | Pathways in cancer                     | -0.39                  | -1.90      | 0.005         |
| hsa01100     | Metabolic pathways                     | -0.24                  | -1.85      | 0.004         |
