# Supplementary material for: Sensory Ion Channel Candidates Inform on the Clinical Course of Pancreatic Cancer and Present Potential Targets for Repurposing of FDA-Approved Agents
Source: MDPI journal article supplement (doi:10.3390/jpm12030478), 2022-03-16
Supplement: s1 [file s1]

**Table S2. Gene Oncology enrichment of TRPC3 and TRPC7 respectively**

| <b>TRPC3</b> |                                                                        |                        |            |               |
|--------------|------------------------------------------------------------------------|------------------------|------------|---------------|
| <b>ID</b>    | <b>Description</b>                                                     | <b>EnrichmentScore</b> | <b>NES</b> | <b>pvalue</b> |
| GO:0050911   | detection of chemical stimulus involved in sensory perception of smell | -0.71                  | -3.95      | 1.45E-10      |
| GO:0070126   | mitochondrial translational termination                                | -0.52                  | -3.74      | 9.51E-09      |
| GO:0070125   | mitochondrial translational elongation                                 | -0.52                  | -3.74      | 5.19E-09      |
| GO:0032543   | mitochondrial translation                                              | -0.44                  | -3.36      | 1.00E-10      |
| GO:0042773   | ATP synthesis coupled electron transport                               | -0.45                  | -3.25      | 7.21E-07      |
| GO:0099024   | plasma membrane invagination                                           | 0.74                   | 2.55       | 1.00E-10      |
| GO:0002920   | regulation of humoral immune response                                  | 0.78                   | 2.66       | 1.00E-10      |
| GO:0030449   | regulation of complement activation                                    | 0.79                   | 2.69       | 1.00E-10      |
| GO:0006956   | complement activation                                                  | 0.78                   | 2.71       | 1.00E-10      |
| GO:0002455   | humoral immune response mediated by circulating immunoglobulin         | 0.79                   | 2.75       | 1.00E-10      |
| <b>TRPC7</b> |                                                                        |                        |            |               |
| <b>ID</b>    | <b>Description</b>                                                     | <b>EnrichmentScore</b> | <b>NES</b> | <b>pvalue</b> |
| GO:0035303   | regulation of dephosphorylation                                        | 0.59                   | 2.01       | 3.07E-03      |
| GO:0016050   | vesicle organization                                                   | 0.59                   | 2.29       | 1.44E-04      |
| GO:0051656   | establishment of organelle localization                                | 0.59                   | 2.28       | 1.49E-04      |
| GO:0007018   | microtubule-based movement                                             | 0.58                   | 2.24       | 1.75E-04      |
| GO:0006470   | protein dephosphorylation                                              | 0.58                   | 1.97       | 4.04E-03      |
| GO:0001819   | positive regulation of cytokine production                             | -0.56                  | -2.26      | 8.58E-04      |
| GO:0031424   | keratinization                                                         | -0.57                  | -3.05      | 2.13E-07      |
| GO:0022617   | extracellular matrix disassembly                                       | -0.62                  | -2.31      | 9.32E-04      |
| GO:0070268   | cornification                                                          | -0.62                  | -3.22      | 2.46E-08      |
| GO:0018149   | peptide cross-linking                                                  | -0.72                  | -2.57      | 5.72E-05      |
